# Supplementary material for: The Antiplatelet Effect of 4-Methylcatechol in a Real Population Sample and Determination of the Mechanism of Action
Source: MDPI journal article supplement (doi:10.3390/nu14224798), 2022-11-13
Supplement: s1 [file s1]

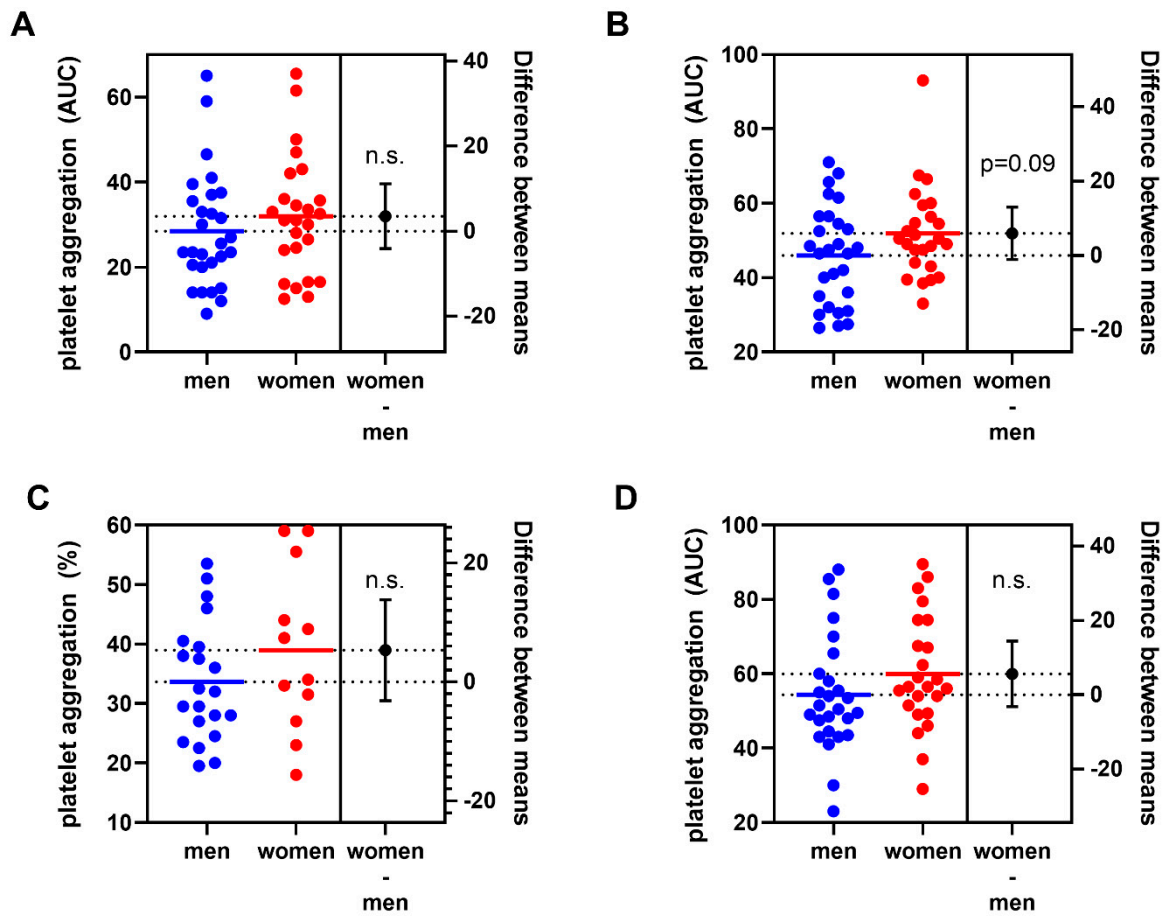

**Figure S1.** Gender differences in responses to 4-methylcatechol. **A:** 4-methylcatechol (10  $\mu$ M) + arachidonic acid (200  $\mu$ M), **B:** 4-methylcatechol (20  $\mu$ M) + collagen (1  $\mu$ g/mL), **C:** 4-methylcatechol (70  $\mu$ M) + collagen (1  $\mu$ g/mL), **D:** 4-methylcatechol (240  $\mu$ M) + ristocetin (400  $\mu$ M). n.s., nonsignificant.

**Table S1.** Summary of diagnoses of the blood donors.

| <b>Condition</b>                | <b>Donors–number (%)</b> |
|---------------------------------|--------------------------|
| hypertension                    | 10 (19%)                 |
| allergy                         | 7 (13%)                  |
| hypothyreosis                   | 6 (11%)                  |
| asthma                          | 2 (4%)                   |
| gastroesophageal reflux disease | 2 (4%)                   |
| chronic glomerulonephritis      | 1 (2%)                   |
| gout                            | 1 (2%)                   |
| hepatopathy                     | 1 (2%)                   |
| nephrolithiasis                 | 1 (2%)                   |
| obesity                         | 1 (2%)                   |
| prediabetes                     | 1 (2%)                   |
| glaucoma                        | 1 (2%)                   |

**Table S2.** Summary of medications taken by the blood donors at the time of blood draw.

| <b>Medication</b>                  | <b>Donors–number (%)</b> |
|------------------------------------|--------------------------|
| antihistamine                      | 8 (15%)                  |
| thyroid hormone                    | 6 (11%)                  |
| angiotensin receptor II antagonist | 4 (8%)                   |
| calcium channel blocker            | 4 (8%)                   |
| proton pump inhibitor              | 3 (6%)                   |
| inhalatory corticoid               | 2 (4%)                   |
| inhalatory $\beta_2$ -agonist      | 2 (4%)                   |
| allopurinol                        | 1 (2%)                   |
| intestinal antiflogistic           | 1 (2%)                   |
| bile acid                          | 1 (2%)                   |
| prostaglandin analogue (topical)   | 1 (2%)                   |

**Table S3.** Level of statistical significance of relationships between biochemical and anthropometric parameters with aggregatory responses to 4-methylcatechol.

|                     | 4-MC 10 $\mu$ M<br>+ AA 200 $\mu$ M | 4-MC 20 $\mu$ M<br>+ collagen 1<br>$\mu$ g/mL | 4-MC 70 $\mu$ M<br>+ collagen 1<br>$\mu$ g/mL | 4-MC 240 $\mu$ M<br>+ ristocetin |
|---------------------|-------------------------------------|-----------------------------------------------|-----------------------------------------------|----------------------------------|
| height              | 0.65                                | 0.18                                          | 0.09                                          | 0.19                             |
| weight              | 0.53                                | 0.45                                          | 0.56                                          | 0.51                             |
| BMI                 | 0.59                                | 0.92                                          | 0.75                                          | 0.11                             |
| glucose             | 0.14                                | 0.79                                          | 0.35                                          | 0.92                             |
| HDL-cholesterol     | 0.98                                | 0.14                                          | 0.72                                          | 0.39                             |
| LDL-cholesterol     | 0.57                                | 0.68                                          | 0.79                                          | 0.56                             |
| non HDL cholesterol | 0.78                                | 0.58                                          | 0.67                                          | 0.59                             |
| total cholesterol   | 0.77                                | 0.99                                          | 0.76                                          | 0.36                             |
| triglycerides       | 0.92                                | 0.89                                          | 0.67                                          | 0.92                             |

Data in the table shows level of the statistical significance ( $p$ ). There were no significant relationships; the  $p$  values are relatively high suggesting no associations with exception of the relationship between the height and the response to collagen after 4-methylcatechol (4-MC) treatment ( $p = 0.09$ ). ASA 30 + AA 200—acetylsalicylic acid 30  $\mu$ M + arachidonic acid 200  $\mu$ M, ASA 70 + AA 200—acetylsalicylic acid 70  $\mu$ M + arachidonic acid 200  $\mu$ M, ASA 70 + collagen 1—acetylsalicylic acid 70  $\mu$ M + collagen 1  $\mu$ g/mL. BMI, body mass index; HDL, high-density lipoprotein; LDL, low-density lipoprotein.
